# Supplementary material
Source: publisher site journal article supplement (https://www.dovepress.com/article/458927)
Supplement: Supplementary file 1 [file get_supplementary_file.php]

TABLE S1 Quality Assessment based on NIH

|  | Jones201611 | Minocha201817 | Deng201915 | Samineni2022a18 | Samineni2022b19 | Gong202316 |
| --- | --- | --- | --- | --- | --- | --- |
| 1. Was the study question or objective clearly stated? | Y | Y | Y | Y | Y | Y |
| 2. Was the study population clearly and fully described, including a case definition? | Y | Y | Y | Y | Y | Y |
| 3. Were the cases consecutive? | NR | NR | NR | NR | NR | NR |
| 4. Were the subjects comparable? | Y | Y | Y | Y | Y | Y |
| 5. Was the intervention clearly described? | Y | Y | Y | Y | Y | Y |
| 6. Were the outcome measures clearly defined, valid, reliable, and implemented consistently across all study participants? | Y | Y | Y | Y | Y | Y |
| 7. Was the length of follow-up adequate? | Y | Y | Y | Y | Y | Y |
| 8. Were the statistical methods well-described? | Y | Y | Y | Y | Y | Y |
| 9. Were the results well-described? | Y | Y | Y | Y | Y | Y |
| Quality Rating (Good, Fair, or Poor) | Good | Good | Good | Good | Good | Good |
| Additional Comments (If POOR, please state why): |  |  |  |  |  |  |

N, no; NR, not reported; Y, yes.
